# Supplementary material
Source: publisher site journal article supplement (https://www.dovepress.com/article/382589)
Supplement: Supplementary file 1 [file get_supplementary_file.php]

# Supplementary File 1: Interview Guide

1. What are your opinions regarding the current evidence pertaining to medical cannabis use?
2. What proportion of your chronic non-cancer pain patients are using medicinal cannabis?
   Prompt: What are your beliefs regarding optimal formulations of CBD and THC content?

Prompt 2: What about forms of delivery (smoked, oils, capsules, vaporizers, or any other?)

1. What is your perception regarding optimal dosing strategy when prescribing medical cannabis?
2. What do you believe regarding the perceived effect that your patients have seen with medical cannabis use?

Prompt: Do you think this differs for certain kinds of chronic non-cancer pain?

1. Do you believe there is pressure to authorize cannabis given the current regulatory focus on reducing use of opioids?
2. What are your opinions regarding access for patients to obtain and use medical cannabis?

Prompt: Do you believe there are any barriers that exist? If so, what are these barriers?

1. Do you perceive a preference amongst patients for smoked, vaped, oils, edibles as a form of consumption?
2. What are your opinions regarding dependence or addiction in relation to medical cannabis use?
3. What are your opinions regarding stigma and medical cannabis use?

Prompt: Do you perceive a stigma within patients? If so, are there certain demographics where this is more, or less, prevalent?

Prompt 2: Do you believe there is a stigma within clinicians towards individuals who are either very pro, or anti, medical cannabis use?
